# Supplementary material for: Efficient single-strand cleavage of DNA mediated by a MnIIIMnIV-based artificial nuclease
Source: Royal Society of Chemistry journal article supplement (doi:10.1039/c3dt51904j), 2013-11-05
Supplement: c3dt51904j.pdf [file c3dt51904j.pdf]

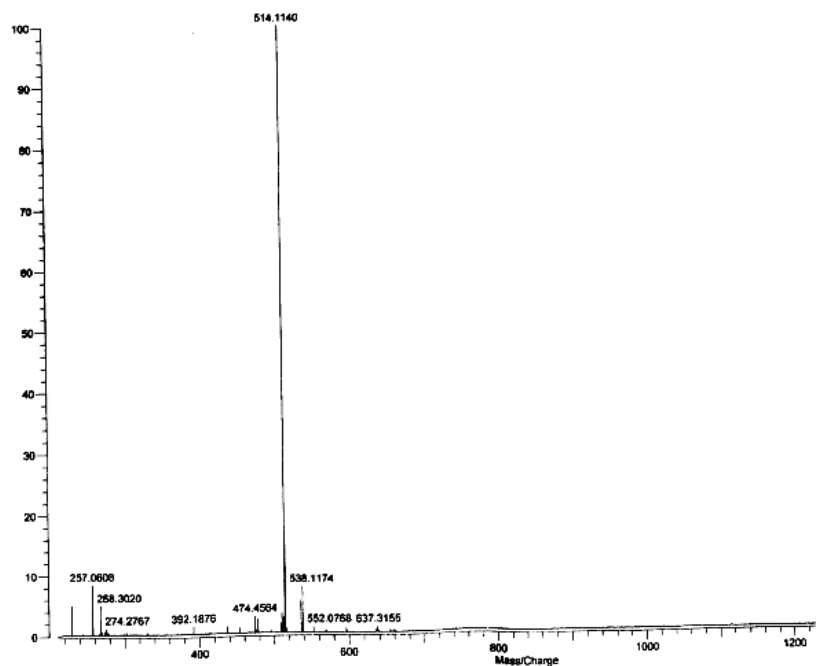

**Figure S1** Electrospray mass spectra and the isotope distribution patterns for **1**. Attributions:  $m/z$  514.1 corresponding to the ion  $[\text{Mn}^{\text{III}}\text{Mn}^{\text{IV}}\text{L}_2(\mu\text{-O})_2]^+$  (**2**)

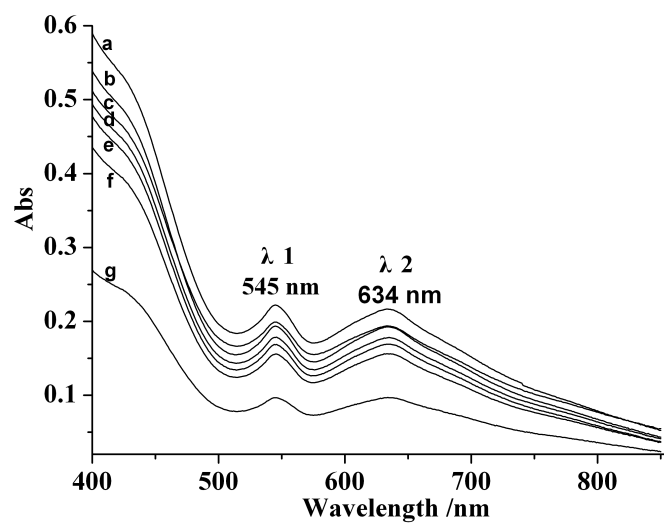

**Figure S2** Electronic spectra of  $[\text{Mn}^{\text{III}}\text{Mn}^{\text{IV}}\text{L}_2(\mu\text{-O})_2]^+$  ( $5.2 \times 10^{-4}$  M,  $4.8 \times 10^{-4}$  M,  $4.4 \times 10^{-4}$  M,  $4.0 \times 10^{-4}$  M,  $3.6 \times 10^{-4}$  M,  $3.2 \times 10^{-4}$  M,  $2.2 \times 10^{-4}$  M, respectively) at room temperature (28 °C), incubation time 4 h: (a) in  $\text{H}_2\text{O}$ , pH 7.0, (b) + 60  $\mu\text{M}$  pBR322 DNA in Tris-HCl/NaCl buffer, pH 7.4, (c) + 28  $\mu\text{M}$  BSA in Tris-HCl/NaCl buffer, pH 7.4, (d) + 200 Unit/ml SOD in Tris-HCl/NaCl buffer, pH 7.4, (e) + 200 Unit/ml catalase in Tris-HCl/NaCl buffer, pH 7.4, (f) + 2 mM  $\text{NaN}_3$  in Tris-HCl/NaCl buffer, pH 7.4, (g) in Tris-HCl/NaCl buffer, pH 7.4.

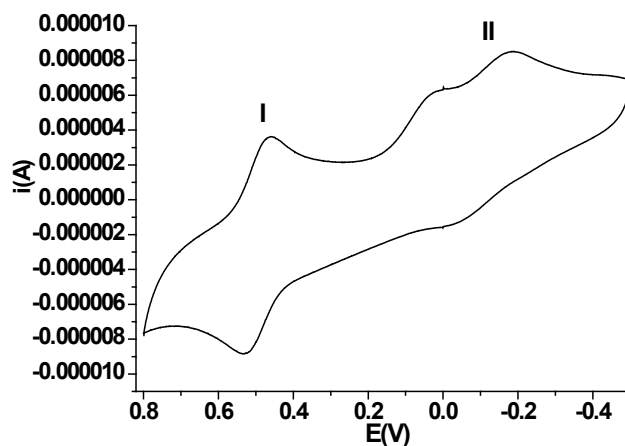

**Figure S3** Cyclic voltammogram at GCE of 1 mM  $[\text{Mn}^{\text{III}}\text{Mn}^{\text{IV}}\text{L}_2(\mu\text{-O})_2]^+$  in  $\text{H}_2\text{O} + 0.1 \text{ M KCl}$ , pH 7.0, scan rate  $v = 30 \text{ m Vs}^{-1}$ , vs. SCE,  $T = 293 \text{ K}$ .

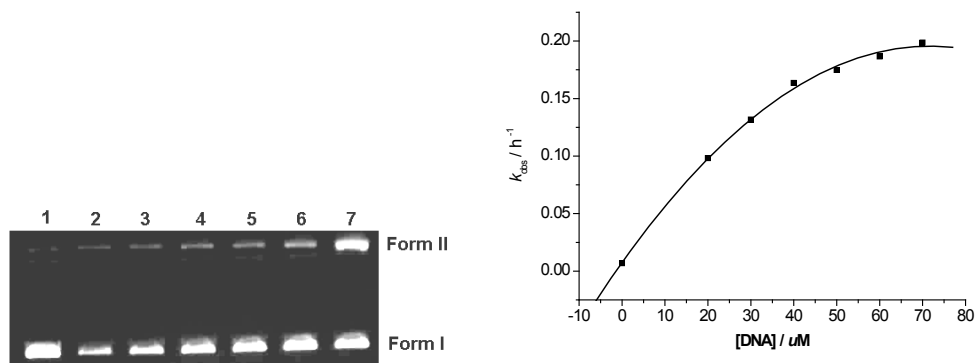

**Figure S4** Cleavage of plasmid pBR322 DNA using 20  $\mu\text{M}$  complex **2** with different concentrations of plasmid pBR322 DNA at 37 °C in Tris-HCl/NaCl buffer (pH 7.4). Lane 1: DNA control (70  $\mu\text{M}$ ); Lane 2-7: complex **2** + DNA (20  $\mu\text{M}$ ; 30  $\mu\text{M}$ ; 40  $\mu\text{M}$ ; 50  $\mu\text{M}$ ; 60  $\mu\text{M}$ ; 70  $\mu\text{M}$ ) (3 h), respectively.
